# Supplementary material for: Biomechanical comparison of cervical interbody fusion cages with ZK60 and Ti-6Al-4V materials: A finite element analysis and lattice topology optimization
Source: Research Square preprint supplement (doi:10.21203/rs.3.rs-118768/v1), 2020-12-18
Supplement: Supplementary file 1 [file 440faa5227d42a31d3d6735e.xlsx]

## Sheet: Sheet1
Component	Density(kg/m3)	Young's Modulus	Poisson's Ratio	Stiffness(N/mm)	Type
Cortical bone	1830	12000	0.29		Solid
Cancellous bone	1000	450	0.29		Solid
Endplate	1830	1000	0.4		Solid
Nucleus	1000	3.4	0.49		Solid
Annulus fibrosus	1200	4.2	0.4		Solid
ZK60	1835	44660	0.305		Solid
Ti-6Al-4V	4429	113800	0.339		Solid
Facet joint	1000	10	0.3		Solid
Ligament
ALL	1100	15	0.3	16	Spring
PLL	1100	10	0.3	25	Spring
CL	1100	4	0.3	19	Spring
ISL	1100	4	0.3	7	Spring
LF	1100	5	0.3	25	Spring
ALL: anterior longitudinal ligament; CL: Cervical ligament; FL: Flaval ligament; ISL: Interspinous ligament; PLL: Posterior longitudinal ligament
Table1 Material properties of all components
