# Supplementary material for: Biomechanical comparison of cervical interbody fusion cages with ZK60 and Ti-6Al-4V materials: A finite element analysis and lattice topology optimization
Source: Research Square preprint supplement (doi:10.21203/rs.3.rs-118768/v1), 2020-12-18
Supplement: Supplementary file 2 [file 9f3f33bf783908a2b2d0d46e.xlsx]

## Sheet: Sheet1
Equivalent Stress
	Ti	ZK60	Optimized	ZK60 vs Ti	Optimized vs ZK60	Optimized vs Ti
Cage(MPa)
Static	1.6861	1.4236	1.1656	-0.155685	-0.181231	-0.308701
Flexion	1.724	1.4131	1.1232	-0.180336	-0.205152	-0.348492
Extension	1.7631	1.5249	1.2521	-0.135103	-0.178897	-0.28983
Left lateral bending	1.7457	1.4574	1.1637	-0.165149	-0.201523	-0.333391
Right lateral bending	1.7645	1.4844	1.209	-0.158742	-0.18553	-0.31482
Left axial rotation	1.6865	1.4142	1.124	-0.161459	-0.205204	-0.333531
Right axial rotation	1.6943	1.4283	1.1673	-0.156997	-0.182735	-0.311043
Bone graft(KPa)
Static	37.993	48.77	69.032	0.283658	0.41546	0.816966
Flexion	38.418	47.905	67.241	0.246942	0.403632	0.750247
Extension	39.104	51.255	74.788	0.310735	0.459136	0.912541
Left lateral bending	38.998	49.674	70.451	0.273758	0.505576	0.917739
Right lateral bending	38.659	49.479	69.996	0.279883	0.423857	0.82237
Left axial rotation	37.952	47.868	67.117	0.261277	0.402127	0.768471
Right axial rotation	38.139	48.93	69.331	0.282939	0.416943	0.81785
Table 2 Equivalent stress of various cages and bone grafts under all circumstances.
